# Supplementary material
Source: publisher figshare collection journal article supplement (https://acs.figshare.com/ndownloader/files/5032243)
Supplement: Supplementary file 1 [file 5032243]

# Responses of organic phosphorus fractionation to environmental conditions and lake evolution

Changwei Lü<sup>1,2,3,\*</sup>, Bing Wang<sup>4</sup>, Jiang He<sup>1,2,\*</sup>, Rolf D. Vogt<sup>3</sup>, Bin Zhou<sup>3,5</sup>, Rui Guan<sup>1</sup>, Le Zuo<sup>1</sup>, Weiying Wang<sup>1</sup>, Zhilei Xie<sup>1</sup>, Jinghua Wang<sup>1</sup>, Daohao Yan<sup>1</sup>

1. College of Environment and Resources, Inner Mongolia University, Huhhot 010021, China.

2. Institute of Environmental Geology, Inner Mongolia University, Huhhot 010021, China.

3. Department of Chemistry, University of Oslo, N-0315, Norway.

4. Forestry College, Inner Mongolia Agricultural University, Huhhot 010019, China.

5. Tianjin Academy of Environmental Sciences, Tianjin, 300191, China.

## Supporting information

Submitted to: Environmental Science & Technology

## S1 Material and Methods

### S1.1 Organic phosphorus fractionation

The fractionation of the individual organic phosphorus (OP) pools is based on the reactivity with the given extractants. The optimized OP fractionation procedure, detailed in the literature,<sup>1</sup> can be simply summarized as follows: The labile pool is extracted with 0.5M NaHCO<sub>3</sub> at pH 8.5. The moderately labile pool is extracted with 1.0 M HCl (HCl-OP), followed by 0.5 M NaOH. The NaOH extract is acidified with concentrated HCl to separate the nonlabile fraction (humic acid fraction, HAOP) from the moderately labile fraction (fulvic acid fraction, FAOP). Finally, the highly resistant (Residual OP, Re-OP), nonlabile fraction is determined by ashing the residue from the NaOH extraction at 550°C for 1 h, followed by dissolution in 1.0 M H<sub>2</sub>SO<sub>4</sub>. In all cases, P concentration in the extracts was determined colorimetrically by the phospho-molybdate method of Murphy and Riley.<sup>2</sup> Acid or alkaline extracts are neutralized prior to P determinations. OP in the extracts is calculated from the difference between total P (TP) and inorganic P (IP). TP in all extracts was measured after an aliquot was digested with K<sub>2</sub>S<sub>2</sub>O<sub>8</sub> + H<sub>2</sub>SO<sub>4</sub>.<sup>3</sup>

\* Corresponding author, Email: [lcw2008@imu.edu.cn](mailto:lcw2008@imu.edu.cn), [ndjhe@imu.edu.cn](mailto:ndjhe@imu.edu.cn)  
Tel: +86-471-4992210  
Fax: +86-471-4992210

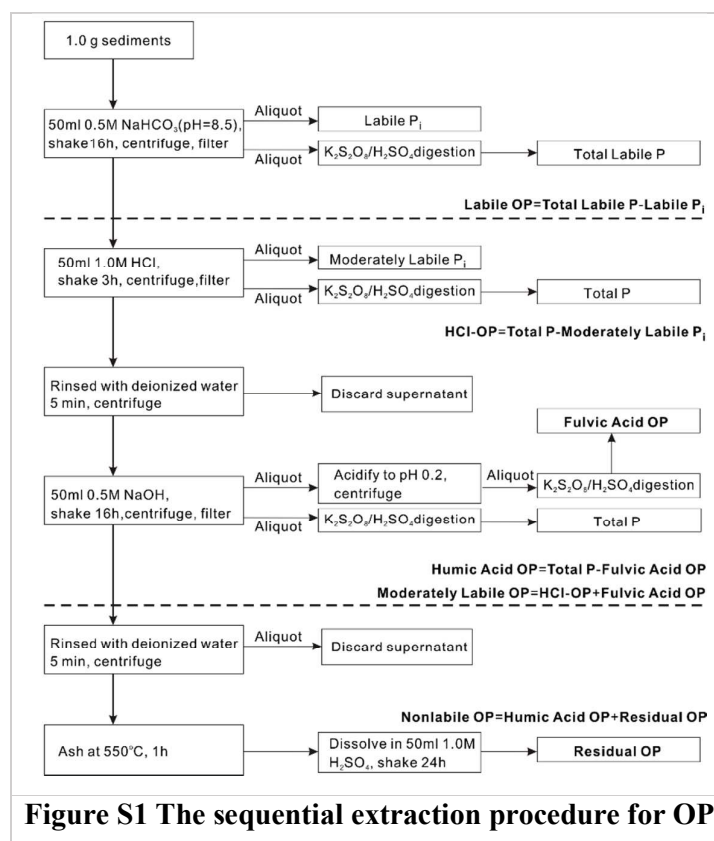

33

34 Total P (TP) in sediments was measured by treating at 500 °C (2 h), followed by HCl  
 35 extraction. Inorganic P (IP) was determined by direct extraction with 1 M HCl (16 h). OP  
 36 concentrations in sediments were calculated as the difference between TP and IP (Aspila et al.,  
 37 1976). The recovery (%) of OP was measured as the ratio of the OP concentration determined  
 38 by extraction to that determined by ignition. The results showed that the recovery of TOP  
 39 ranged from 90.25% to 110.93%, with an average of 99.81% (Table S1 and S2), suggesting  
 40 that total OP in sediments was satisfactorily extracted with this procedure.

41

42

43

44

45

46

47

48

49

50

51

**Table S1 Concentration and recovery of TP, IP and TOP in surface sediments**

|                    | Concentration (mg/kg) |        |        | Recovery (%) |        |        |
|--------------------|-----------------------|--------|--------|--------------|--------|--------|
|                    | TP                    | IP     | TOP    | TP           | IP     | TOP    |
| <b>HLH1 (n=3)</b>  | 498.01                | 427.38 | 70.63  | 104.55       | 104.93 | 102.39 |
| <b>HLH2 (n=3)</b>  | 707.39                | 536.54 | 170.86 | 100.93       | 99.86  | 104.23 |
| <b>HLH3 (n=3)</b>  | 654.63                | 501.11 | 153.51 | 98.80        | 98.89  | 98.71  |
| <b>HLH5 (n=5)</b>  | 738.72                | 549.54 | 189.18 | 101.85       | 100.34 | 103.36 |
| <b>HLH6 (n=3)</b>  | 701.66                | 534.25 | 167.41 | 101.80       | 101.73 | 102.02 |
| <b>HLH7 (n=3)</b>  | 821.87                | 603.24 | 218.63 | 96.35        | 96.44  | 96.28  |
| <b>HLH9 (n=3)</b>  | 709.49                | 531.19 | 178.31 | 100.71       | 100.92 | 100.34 |
| <b>HLH10 (n=3)</b> | 698.37                | 490.17 | 208.20 | 102.89       | 103.83 | 101.16 |
| <b>HLH11 (n=3)</b> | 823.55                | 676.27 | 147.27 | 99.99        | 99.93  | 100.65 |
| <b>HLH12 (n=3)</b> | 390.86                | 312.00 | 78.86  | 99.69        | 99.86  | 99.71  |
| <b>HLH13 (n=3)</b> | 324.84                | 244.57 | 80.27  | 100.19       | 99.97  | 100.88 |
| <b>HLH14 (n=5)</b> | 563.35                | 447.28 | 116.07 | 97.85        | 97.39  | 98.31  |
| <b>HLH15 (n=3)</b> | 643.53                | 525.61 | 117.93 | 98.71        | 98.55  | 99.45  |
| <b>HLH16 (n=3)</b> | 705.83                | 548.08 | 157.75 | 100.43       | 100.24 | 101.30 |
| <b>HLH17 (n=3)</b> | 750.67                | 605.17 | 145.51 | 96.00        | 95.53  | 97.86  |
| <b>HLH19 (n=3)</b> | 853.36                | 645.09 | 208.27 | 97.85        | 98.59  | 95.82  |
| <b>HLH20 (n=3)</b> | 758.25                | 585.55 | 172.71 | 99.74        | 100.32 | 98.21  |
| <b>HLH21 (n=5)</b> | 703.52                | 511.17 | 192.34 | 97.46        | 98.82  | 96.09  |
| <b>HLH22 (n=3)</b> | 690.89                | 535.57 | 155.32 | 99.35        | 99.82  | 98.39  |
| <b>HLH23 (n=3)</b> | 756.61                | 626.66 | 129.95 | 95.16        | 94.11  | 100.53 |
| <b>HLH24 (n=3)</b> | 440.88                | 344.05 | 96.84  | 98.15        | 97.96  | 98.85  |
| <b>HLH25 (n=5)</b> | 711.20                | 609.76 | 101.44 | 100.96       | 100.04 | 101.88 |
| <b>HLH26 (n=3)</b> | 770.53                | 621.77 | 148.76 | 97.43        | 97.35  | 98.32  |
| <b>HLH27 (n=5)</b> | 832.35                | 628.78 | 203.57 | 98.16        | 95.76  | 100.55 |
| <b>HLH28 (n=3)</b> | 677.36                | 525.05 | 152.31 | 103.94       | 103.16 | 106.67 |
| <b>HLH29 (n=3)</b> | 788.12                | 612.75 | 175.37 | 92.58        | 92.26  | 93.77  |
| <b>HLH31 (n=3)</b> | 404.91                | 299.13 | 105.78 | 100.90       | 101.14 | 100.68 |
| <b>HLH32 (n=3)</b> | 362.85                | 230.40 | 132.46 | 92.37        | 90.33  | 95.80  |
| <b>HLH33 (n=3)</b> | 377.69                | 288.58 | 89.11  | 104.83       | 104.16 | 107.20 |

52

53

54

55

56

57

58

59

60

**Table S2 Concentration and recovery of TP, IP and TOP in sediment core**

| Depth(cm)    | Concentrations (mg/kg) |        |        | Recovery (%) |        |        |
|--------------|------------------------|--------|--------|--------------|--------|--------|
|              | TP                     | IP     | TOP    | TP           | IP     | TOP    |
| <b>0-2</b>   | 611.43                 | 350.54 | 260.89 | 94.23        | 94.69  | 93.62  |
| <b>2-4</b>   | 628.14                 | 381.08 | 247.07 | 91.74        | 90.87  | 93.07  |
| <b>4-6</b>   | 598.19                 | 379.31 | 218.87 | 90.37        | 89.53  | 91.83  |
| <b>6-8</b>   | 610.60                 | 374.27 | 236.33 | 92.35        | 93.03  | 91.29  |
| <b>8-10</b>  | 570.16                 | 364.50 | 205.66 | 101.45       | 96.24  | 110.70 |
| <b>10-12</b> | 599.82                 | 323.16 | 276.66 | 99.26        | 101.45 | 96.70  |
| <b>12-14</b> | 590.12                 | 345.14 | 244.97 | 101.80       | 97.54  | 107.79 |
| <b>14-16</b> | 605.68                 | 348.01 | 257.67 | 97.82        | 100.37 | 94.37  |
| <b>16-18</b> | 550.18                 | 326.81 | 223.37 | 94.28        | 97.04  | 90.25  |
| <b>18-20</b> | 546.16                 | 346.36 | 199.80 | 105.37       | 107.21 | 102.18 |
| <b>20-22</b> | 598.26                 | 397.57 | 200.69 | 98.30        | 97.76  | 99.38  |
| <b>22-24</b> | 574.14                 | 397.45 | 176.70 | 98.99        | 93.68  | 110.93 |
| <b>24-26</b> | 480.41                 | 331.31 | 149.11 | 105.15       | 103.91 | 107.92 |
| <b>26-28</b> | 451.51                 | 310.03 | 141.48 | 96.56        | 99.24  | 90.69  |
| <b>28-30</b> | 550.10                 | 363.41 | 186.69 | 108.97       | 108.14 | 110.58 |
| <b>30-32</b> | 582.50                 | 390.93 | 191.56 | 100.35       | 97.00  | 107.20 |
| <b>32-34</b> | 581.40                 | 382.74 | 198.66 | 101.21       | 98.37  | 106.68 |
| <b>34-36</b> | 582.22                 | 397.84 | 184.37 | 96.46        | 97.39  | 94.46  |
| <b>36-38</b> | 617.99                 | 384.15 | 233.84 | 97.19        | 100.12 | 92.39  |
| <b>38-40</b> | 649.47                 | 429.90 | 219.57 | 96.26        | 97.03  | 94.75  |
| <b>40-42</b> | 676.63                 | 421.68 | 254.95 | 93.91        | 95.76  | 90.87  |
| <b>42-44</b> | 549.31                 | 360.09 | 189.23 | 107.91       | 108.03 | 107.67 |
| <b>44-46</b> | 685.81                 | 428.54 | 257.28 | 92.76        | 91.85  | 94.27  |
| <b>46-48</b> | 531.07                 | 349.47 | 181.60 | 106.92       | 105.42 | 109.82 |
| <b>48-50</b> | 520.61                 | 322.21 | 198.40 | 109.49       | 109.89 | 108.85 |
| <b>50-52</b> | 621.80                 | 405.63 | 216.18 | 96.87        | 90.13  | 109.51 |
| <b>52-54</b> | 657.88                 | 402.73 | 255.15 | 93.61        | 91.96  | 96.23  |
| <b>54-56</b> | 625.61                 | 388.55 | 237.05 | 97.15        | 93.91  | 102.45 |
| <b>56-58</b> | 566.48                 | 348.41 | 218.07 | 101.74       | 97.46  | 108.57 |
| <b>59-60</b> | 562.44                 | 364.09 | 198.35 | 100.69       | 98.37  | 104.94 |
| <b>60-62</b> | 464.83                 | 348.88 | 115.95 | 103.99       | 105.99 | 97.95  |
| <b>62-64</b> | 517.99                 | 395.19 | 122.80 | 92.72        | 93.02  | 91.76  |
| <b>64-66</b> | 502.13                 | 386.75 | 115.38 | 97.76        | 96.34  | 102.53 |
| <b>66-68</b> | 531.80                 | 392.23 | 139.57 | 93.68        | 91.74  | 99.14  |
| <b>68-70</b> | 576.63                 | 416.84 | 159.80 | 90.88        | 90.79  | 91.12  |
| <b>70-72</b> | 542.90                 | 409.24 | 133.66 | 93.18        | 93.42  | 92.45  |
| <b>72-74</b> | 560.58                 | 415.83 | 144.75 | 95.37        | 95.90  | 93.86  |
| <b>74-76</b> | 531.04                 | 405.32 | 125.71 | 95.76        | 96.05  | 94.81  |
| <b>76-78</b> | 521.06                 | 395.19 | 125.87 | 100.32       | 99.95  | 101.47 |
| <b>78-80</b> | 549.10                 | 412.12 | 136.98 | 101.16       | 100.69 | 102.56 |

Furthermore, surface sediments samples from 5 sites (HLH5, HLH14, HLH21, HLH25, HLH27) were selected, capturing the span in levels of different OP fractions, to check the precision of the laboratory methods. Average values and standard deviation (SD) from the analysis of 5 replicate samples for TOP, and for the five fractions determined directly by the OP fractionation procedures are given in Table S3. TOP is determined as the differences between the TP and TIP, which are both relatively large values compared to the OP. Thus the precision in the TOP data was expected to be especially poor, though the average relative standard deviation (RSD) turned out to be 3.3%. This is within the range achieved for the other OP fractions (2.3-4.8%).

72

73 **Table S3 Concentration of OP fractions in sediment from HLH (average  $\pm$  SD) (mg/kg)**

|             | LOP              | HCl-OP           | FAOP             | HAOP             | ReOP             | TOP               |
|-------------|------------------|------------------|------------------|------------------|------------------|-------------------|
| HLH5 (n=5)  | 1.88 $\pm$ 0.05  | 40.01 $\pm$ 1.23 | 48.19 $\pm$ 2.20 | 10.37 $\pm$ 0.54 | 94.42 $\pm$ 2.75 | 194.86 $\pm$ 6.31 |
| HLH14 (n=5) | 5.00 $\pm$ 0.20  | 13.28 $\pm$ 0.43 | 18.98 $\pm$ 0.88 | 5.71 $\pm$ 0.18  | 69.92 $\pm$ 2.07 | 112.89 $\pm$ 3.32 |
| HLH21 (n=5) | 11.30 $\pm$ 0.21 | 15.43 $\pm$ 0.63 | 40.36 $\pm$ 2.50 | 18.16 $\pm$ 0.68 | 98.55 $\pm$ 3.09 | 183.79 $\pm$ 6.78 |
| HLH25 (n=5) | 2.19 $\pm$ 0.03  | 24.85 $\pm$ 0.76 | 22.17 $\pm$ 0.66 | 12.20 $\pm$ 0.49 | 41.87 $\pm$ 1.60 | 103.23 $\pm$ 2.90 |
| HLH27 (n=5) | 19.03 $\pm$ 0.29 | 7.02 $\pm$ 0.18  | 75.50 $\pm$ 4.20 | 10.46 $\pm$ 0.46 | 90.92 $\pm$ 3.14 | 202.93 $\pm$ 8.04 |

74

75 All analytical results are expressed as their average value of three sample replicate  
76 measurements. The data were subjected to standard analysis of variance appropriate to a  
77 factorial randomized block design. Wherever appropriate, the treatment average were  
78 compared at 5% level of significance using least significant difference. The SD's for each OP  
79 fraction are given in Table S4. The precision and accuracy of the fractionation procedure have  
80 also been described in preceding studies.<sup>1,4</sup>

81 As can be seen from Table S1-S4, the recovery and SD suggest that OP determination in  
82 sediments was satisfactorily extracted with this procedure and the results were relatively  
83 accurate for OP concentrations in lake sediments.

84

85

86

87

88

89

90

91

**Table S4 Standard derivation of different OP fractions in the sediments (mg/kg)**

|             | LOP  | HCl-OP | FAOP | HAOP | ReOP |
|-------------|------|--------|------|------|------|
| HLH1 (n=3)  | 0.12 | 0.47   | 0.18 | 0.36 | 2.28 |
| HLH2 (n=3)  | 0.07 | 2.38   | 1.72 | 1.15 | 2.87 |
| HLH3 (n=3)  | 0.17 | 0.74   | 2.11 | 0.83 | 3.11 |
| HLH5 (n=5)  | 0.05 | 1.23   | 2.20 | 0.54 | 2.75 |
| HLH6 (n=3)  | 0.13 | 0.44   | 2.19 | 0.96 | 4.21 |
| HLH7 (n=3)  | 0.30 | 0.99   | 2.43 | 0.62 | 5.42 |
| HLH9 (n=3)  | 0.15 | 0.85   | 1.94 | 0.96 | 4.39 |
| HLH10 (n=3) | 0.14 | 1.38   | 1.90 | 0.99 | 5.39 |
| HLH11 (n=3) | 0.04 | 2.47   | 1.26 | 0.43 | 2.61 |
| HLH12 (n=3) | 0.08 | 0.65   | 0.33 | 0.06 | 2.56 |
| HLH13 (n=3) | 0.04 | 0.75   | 0.23 | 0.29 | 2.49 |
| HLH14 (n=5) | 0.20 | 0.43   | 0.88 | 0.18 | 2.07 |
| HLH15 (n=3) | 0.05 | 0.35   | 1.74 | 0.61 | 2.64 |
| HLH16 (n=3) | 0.14 | 0.75   | 1.88 | 0.77 | 3.86 |
| HLH17 (n=3) | 0.07 | 0.27   | 2.26 | 0.91 | 3.06 |
| HLH19 (n=3) | 0.37 | 0.74   | 2.66 | 0.62 | 4.80 |
| HLH20 (n=3) | 0.19 | 1.95   | 2.02 | 0.47 | 3.15 |
| HLH21 (n=5) | 0.21 | 0.63   | 2.50 | 0.68 | 3.09 |
| HLH22 (n=3) | 0.33 | 0.27   | 1.93 | 1.14 | 3.38 |
| HLH23 (n=3) | 0.29 | 1.66   | 0.87 | 0.31 | 2.88 |
| HLH24 (n=3) | 0.06 | 0.66   | 0.42 | 0.10 | 3.28 |
| HLH25 (n=5) | 0.03 | 0.76   | 0.66 | 0.49 | 1.60 |
| HLH26 (n=3) | 0.20 | 2.38   | 1.21 | 0.52 | 2.41 |
| HLH27(n=5)  | 0.29 | 0.18   | 4.20 | 0.46 | 3.14 |
| HLH28 (n=3) | 0.31 | 0.11   | 1.99 | 0.64 | 4.52 |
| HLH29 (n=3) | 0.27 | 1.12   | 2.65 | 0.88 | 2.57 |
| HLH31 (n=3) | 0.02 | 0.55   | 0.35 | 0.18 | 3.92 |
| HLH32 (n=3) | 0.16 | 2.08   | 0.28 | 0.12 | 3.26 |
| HLH33 (n=3) | 0.36 | 0.77   | 0.43 | 0.10 | 2.81 |

## 94 **S1.2 Other Experiments and methods**

95 Total inorganic carbonate (TIC) in the sediments was measured by volumetric titration  
 96 with HCl (1:4, v/v). Organic oxidation by dichromate was applied to measure OM content in  
 97 the sediments,<sup>5,6</sup> and TOC was derived by dividing the OM content by 1.724. Allo-OC was  
 98 estimated using a binary model which has previously been successfully applied in Lake  
 99 Daihai in Inner Mongolia plateau.<sup>7</sup> Total nitrogen in the sediments was analyzed by Kjeldahl  
 100 method using a BÜCHI B-324 distillation unit. The concentrations of Fe, Al, Ca, Mg, Sr and  
 101 Ba in sediments were determined using atomic absorption spectrometer (Perkin Elmer,  
 102 AA800). Previous studies had established the depth-age relationship for the core of HL06,  
 103 using fallout radionuclide <sup>210</sup>Pb and <sup>137</sup>Cs method,<sup>8</sup> which were performed at the State Key

104 Laboratory of Lake Science and Environment at the Nanjing Institute of Geography &  
105 Limnology, Chinese Academy of Science.

## 106 **S2 Results**

### 107 **S2.1 Regression models**

108 Organic matter in lacustrine sediments includes detrital terrestrial and aquatic organic  
109 materials. There are two general sources: organic matter produced in the aquatic system via  
110 photosynthesis (autochthonous), and terrestrial organic matter from the catchment basins  
111 delivered via tributaries (allochthonous). Typical autochthonous sources of organic matter are  
112 phytoplankton, algae, and macrophytes, while typical allochthonous sources of organic  
113 matter are plant detritus, soil organic matter and soil humus. The content of Allo-OC in  
114 sediments is mainly controlled by the climate and environmental conditions in the catchment  
115 basin. The greater the amount of annual precipitation (MAP), the more surface or sub-lateral  
116 runoff and thicker and denser vegetation cover is likely to be found. Both factor lead in turn  
117 to a high flux of OM from the terrestrial environment into surface waters and thus to a high  
118 amount of allochthonous organic carbon (Allo-OC) in the lake sediments<sup>7</sup>. Hence the content  
119 of Allo-OC in lacustrine sediments may reflect the water supply rate to the lake. Likewise, its  
120 variations within the sedimentary column may correspond to changes in lake level. This  
121 relationship is further enhanced by (1) greater input of nutrients when the water discharge is  
122 high<sup>9</sup> and (2) better conservation of organic matter when the lake level is high, favoring  
123 anoxic conditions near or above the water-sediment interface.<sup>10, 11</sup> Accordingly, levels of  
124 Allo-OC in sediments are an index of past environment conditions in the watershed, enabling  
125 us to reconstruct historical changes in lake levels.<sup>7, 11, 12</sup>

126 A significant correlation ( $p < 0.0099$ ) was found between Allo-OC and the lake level of  
127 Lake Hulun during the last 50 years (Figure S2(a)). Using this regression model the historical  
128 changes in lake level of Lake Hulun were reconstructed according to the variations in the  
129 Allo-OC pools in the sediment core. Salinity is a key indicator of changes in water balance,  
130 which in turn is related to the lake levels:<sup>13</sup> A significant correlation ( $p < 0.0000$ ) was thus  
131 found between salinity and lake level in Lake Hulun over the past 50 years (Figure S2(b)).  
132 Historical changes in salinity could thereby be reconstructed using the regression model  
133 according to the above modeled historical lake level. The runoff from the lake basin was  
134 reconstructed based on the significant correlation found between HCl-OP and runoff during  
135 the last 50 years (Figure S2(c)).

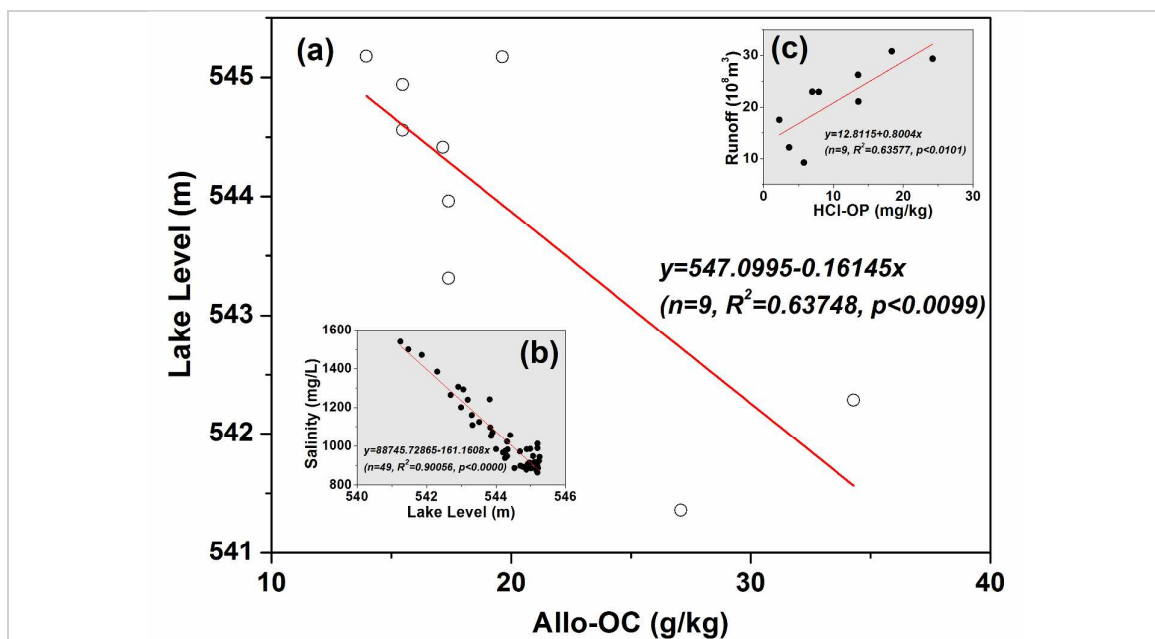

**Figure S2 Regression models of (a) Allo-OC and lake level, (b) lake level and salinity, and (c) HCl-OP and runoff**

136

137 An empirical quadratic function model, linking lake level to lake area, was based on the  
 138 large recorded changes in lake surface area during the last 50 years (Figure S3). The axis of  
 139 symmetry for the model was  $x_{\text{Lake Level}} = 545.75\text{m}$ , indicating the maximum lake level of Lake  
 140 Hulun. At this lake level the water flow out of Lake Hulun through the Dalanolom River to  
 141 the Hailaer River (see Study area) balances the inflow of water from its watershed.

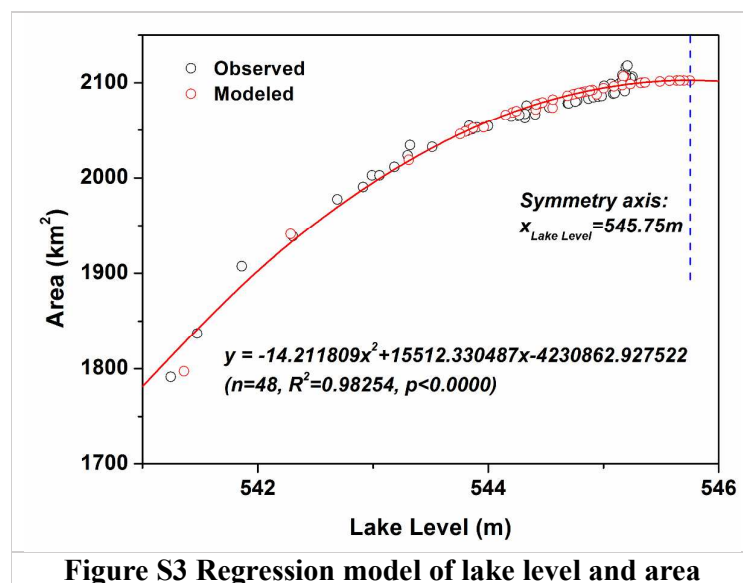

**Figure S3 Regression model of lake level and area**

142

## 143 S2.2 Redundancy analysis

144 Redundancy analysis (RDA), which is a constraint ordination technique, was applied to



145 understand the relationships between the OP fractions and environmental data. RDA is a  
146 linear direct gradient analysis that uses responsive variables (species) and explanatory  
147 variables (environmental parameter) in a single integrated analysis. The concentrations and  
148 distribution of OP pools in surface sediments from the 13 selected lakes listed in Table S1  
149 were used as response variables. The geographical latitude (N), the mean annual temperature  
150 (MAT) and the mean annual precipitation (MAP) of the lakes, along with the OM  
151 concentration in surface sediments as well as the pH and the total salinity (TS) in overlying  
152 water were used as the explanatory parameters. Before the RDA, we tested whether the  
153 dataset was based on a linear or unimodal ordination model. Detrended constrained canonical  
154 analysis (DCCA) generated a length value for the longest gradient below 3, suggesting it was  
155 suitable for linear direct gradient analysis.<sup>14</sup> The forward selection function combined with  
156 Monte Carlo permutation tests was used to find the significant environmental parameters  
157 ( $p < 0.05$ ) to explain the variation in the two datasets.

158 To interpret the correlations between one of the OP fractions and one of the  
159 environmental parameters, Figure 2(a) may be read by projecting the arrow tips of the OP  
160 fraction perpendicular to the extended arrow of the environmental parameter (e.g. OM, Lat,  
161 MAP). The nearer the projection lies in the direction of the environmental parameter arrow,  
162 the higher the correlation. No correlation exists when the projection lies close to the origin of  
163 the ordination plot. Projections with opposite directions reveal negative correlations, with  
164 increasing strength with increasing parameter loading along the axis.

165

### 166 **S2.3 OP pools in surface sediments**

167 OP levels in surface sediments from Lake Hulun and the other 12 studied lakes were listed in  
168 Table S5. As can be seen from Table S5, the concentration ranges of total extracted OP (TOP)  
169 were 72.2-210 mg/kg with the means of 146 mg/kg in surface sediments from HLH. The  
170 ranges of MLOP and NLOP were 14.7-92.6 and 54.0-133 mg/kg in surface sediments from  
171 HLH with the relative contribution of 19-57% and 42-80% to TOP, respectively. The average  
172 concentration of LOP found in surface sediments from HLH was 4.54 mg/kg with the  
173 average percentages of 3.0%.

174

175

176

Table S5 OP pools in surface sediments from Lake Hulun and other lakes in China

| Lakes           |                | LOP   |       | MLOP   |       |        |       | NLOP  |       |        |       | MLOP   |       | NLOP   |       | Total<br>Extracted OP<br>mg/kg | TOP<br>Recovery<br>% |
|-----------------|----------------|-------|-------|--------|-------|--------|-------|-------|-------|--------|-------|--------|-------|--------|-------|--------------------------------|----------------------|
|                 |                |       |       | HCl-OP |       | FAOP   |       | HAOP  |       | Re-OP  |       |        |       |        |       |                                |                      |
|                 |                | mg/kg | %     | mg/kg  | %     | mg/kg  | %     | mg/kg | %     | mg/kg  | %     |        |       |        |       |                                |                      |
| Hulun<br>(n=29) | Min            | 0.55  | 0.52  | 2.34   | 1.44  | 4.14   | 5.12  | 1.33  | 1.70  | 41.87  | 32.36 | 14.67  | 19.26 | 54.07  | 41.55 | 72.15                          | 93.77-107.20         |
|                 | Max            | 19.03 | 9.38  | 54.86  | 37.03 | 75.50  | 37.27 | 24.60 | 16.00 | 112.16 | 76.67 | 92.59  | 56.70 | 132.65 | 80.22 | 210.42                         |                      |
|                 | Mean           | 4.54  | 3.04  | 22.49  | 15.97 | 34.90  | 22.05 | 12.28 | 8.10  | 72.05  | 50.83 | 57.39  | 38.03 | 84.33  | 58.94 | 146.26                         |                      |
| Qilu            | QL1            | 16.64 | 4.80  | 43.54  | 12.56 | 21.34  | 6.16  | 12.63 | 3.64  | 252.53 | 72.84 | 64.88  | 18.71 | 265.16 | 76.49 | 346.68                         | 100.33-109.31        |
|                 | QL3            | 9.01  | 2.54  | 48.66  | 13.74 | 21.24  | 6.00  | 7.50  | 2.12  | 267.68 | 75.60 | 69.90  | 19.74 | 275.18 | 77.71 | 354.09                         |                      |
|                 | QL5            | 8.28  | 2.80  | 51.99  | 17.59 | 13.58  | 4.60  | 9.52  | 3.22  | 212.12 | 71.79 | 65.57  | 22.19 | 221.64 | 75.01 | 295.49                         |                      |
| Erhai           |                | 8.70  | 3.76  | 15.30  | 6.61  | 57.20  | 24.73 | 17.80 | 7.70  | 132.30 | 57.20 | 72.50  | 31.34 | 150.10 | 64.89 | 231.30                         | 98.9                 |
| Hongfeng        |                | 18.30 | 5.96  | 52.30  | 17.02 | 44.00  | 14.32 | 28.50 | 9.27  | 164.20 | 53.43 | 96.30  | 31.34 | 192.70 | 62.71 | 307.30                         | 101.1                |
| Chenghai        | CH3            | 2.02  | 1.44  | 15.66  | 11.20 | 48.87  | 34.94 | 16.39 | 11.72 | 56.93  | 40.70 | 64.53  | 46.14 | 73.32  | 52.42 | 139.87                         | 100.91-105.03        |
|                 | CH5            | 3.03  | 2.01  | 12.63  | 8.37  | 44.68  | 29.61 | 32.63 | 21.63 | 57.92  | 38.39 | 57.31  | 37.98 | 90.55  | 60.01 | 150.89                         |                      |
| Baihua          |                | 17.50 | 4.27  | 123.40 | 30.14 | 47.30  | 11.55 | 35.50 | 8.67  | 185.70 | 45.36 | 170.70 | 41.70 | 221.20 | 54.03 | 409.40                         | 96.7                 |
| Lugu            | L2             | 34.76 | 8.85  | 47.60  | 12.11 | 11.84  | 3.01  | 58.67 | 14.93 | 240.10 | 61.10 | 59.44  | 15.13 | 298.77 | 76.03 | 392.97                         | 84.71-100.36         |
|                 | L8             | 43.16 | 11.43 | 57.12  | 15.12 | 42.61  | 11.28 | 35.51 | 9.40  | 199.26 | 52.76 | 99.73  | 26.41 | 234.77 | 62.16 | 377.66                         |                      |
| Taihu           | Gonghu bay     | 8.60  | 5.97  | 41.10  | 28.54 | 27.00  | 18.75 | 23.90 | 16.60 | 43.40  | 30.14 | 68.10  | 47.29 | 67.30  | 46.74 | 144.00                         | 99.5                 |
|                 | Meiliang bay   | 11.00 | 5.63  | 63.90  | 32.69 | 29.60  | 15.14 | 21.30 | 10.90 | 69.70  | 35.65 | 93.50  | 47.83 | 91.00  | 46.55 | 195.50                         | 100.3                |
|                 | Yuantouzhu bay | 9.30  | 6.02  | 42.60  | 27.55 | 30.50  | 19.73 | 26.00 | 16.82 | 46.20  | 29.88 | 73.10  | 47.28 | 72.20  | 46.70 | 154.60                         | 94.3                 |
| Chaohu          | C1             | 16.18 | 7.96  | 41.75  | 20.54 | 47.01  | 23.13 | 13.22 | 6.50  | 85.10  | 41.87 | 88.76  | 43.67 | 98.32  | 48.37 | 203.26                         | 97.89-99.01          |
|                 | C14            | 13.83 | 8.70  | 65.21  | 41.03 | 17.40  | 10.95 | 16.39 | 10.31 | 46.12  | 29.02 | 82.61  | 51.97 | 62.51  | 39.33 | 158.95                         |                      |
| Qinghai         | Q4             | 4.87  | 2.80  | 24.72  | 14.22 | 24.15  | 13.89 | 48.33 | 27.80 | 71.78  | 41.29 | 48.87  | 28.11 | 120.11 | 69.09 | 173.85                         | 94.48-99.56          |
|                 | Q7             | 11.20 | 6.08  | 17.22  | 9.35  | 18.94  | 10.28 | 52.65 | 28.59 | 84.16  | 45.70 | 36.16  | 19.63 | 136.81 | 74.28 | 184.17                         |                      |
| Wuliangsuhai    |                | 2.53  | 1.94  | 28.27  | 21.72 | 29.72  | 22.84 | 12.42 | 9.54  | 57.21  | 43.95 | 58.00  | 44.56 | 69.63  | 53.50 | 130.16                         | 92.83-105.51         |
| Jingpo          |                | 5.50  | 2.27  | 98.00  | 40.45 | 60.00  | 24.77 | 37.50 | 15.48 | 41.25  | 17.03 | 158.00 | 65.22 | 78.75  | 32.51 | 242.25                         | 104.27               |
| Wudalianchi     |                | 43.00 | 9.93  | 155.50 | 35.91 | 100.00 | 23.09 | 20.75 | 4.79  | 113.75 | 26.27 | 255.50 | 59.01 | 134.50 | 31.06 | 433.00                         | 97.43                |

**Data sources:** Data of OP fractions in Lake Qilu, Chenghai, Lugu, Chaohu, Qinghai, Wudalianchi and Jingpo from Hou et al,<sup>4</sup> OP fractions in Lake Erhai, Hongfeng, Baihua and Taihu (bays of Gonghu, Meiliang and Yuantouzhu) from Zhang et al,<sup>1</sup> OP fractions in Lake Hulun and Wuliangsuhai were determined in this work.

## **S3 Discussion**

### **3.1 Spatial distribution of OP**

The spatial distribution of TOC and TOP in the HLH surface sediments showed clear decreasing trends from the west to the east lake districts (Figure S4). Geomorphologically, the relatively hilly terrains protected by only a semi-arid grassland with less than 40% vegetation cover on the west bank of HLH allow for enhanced soil erosion during rainy season. As a result, a large import of suspended matter, associated OM and nutrients from the HLH west bank are anticipated. This loading of eroded organic matter and nutrients, transported during periods of overland flow, is believed to be one of the main nutrient sources of HLH. Furthermore, the prevailing wind direction is from the 150 km long northwestern shore line to the southeast. The amounts of loess and dry grass deposited into HLH are estimated to be  $6.44 \times 10^4$  t and 3350 t each year. Previous studies have documented that silty clay is the dominating particle size found in the sediments on the northwest lake bottom, while it is mainly sandy deposit on the south and east lake bottom.<sup>15</sup> Therefore, on the one hand, there are more inputs of loess and dry grass driven by the prevailing wind in the west lake districts; on the other hand, the inputs will be conserved effectively due to the finer grain size in these lake districts. The decreasing trends of TOC and TOP from west to east in the surface sediments from HLH is thus likely due to the combined effect of larger influx of eroded soil material and loess along with dry grass in the west than in the east.

Actually, dissolved OP (DOP) constitutes a major fraction of dissolved phosphorus in surface waters, comprising up to 75% of total dissolved P (TDP).<sup>16-18</sup> This fraction is believed to represent an important potential reservoir for the more bioavailable inorganic phosphorous. Over the past decades, DOP has therefore been increasingly recognized as a critical driver for aquatic biological production and thus ecosystem structure and function.<sup>19, 20</sup> DOP in water above the sediment in HLH accounted for as much as 24-54% of TDP, implying that this fraction may play an major role as a potential P source for the primary producers.<sup>21, 22</sup> The level of P levels in water column is mainly governed by the balance between allochthonous P inputs from the watershed and internal loading from the sediments on the one side and assimilation followed by sedimentation and adsorption across the interface of water-sediments, as well as runoff on the other. The spatial distribution pattern of DOP differs from the TOC and TOP (Figure S4). The highest DOP levels were found in areas close to the lake inlets, suggesting that the main sources of DOP to the lake is allochthonous, through the main tributary streams, rather than internal cycling from the sediments. Also the midwestern

214 part of the lake had elevated levels of DOP. DOP in aquatic environments may come from the  
 215 secretions and excretions of living bacteria, plants, and animals or from the decomposition of  
 216 dead organisms.<sup>23</sup> The elevated DOP levels in the Midwest can thus be explained by the  
 217 measured higher biomass levels of phytoplankton in this part of the lake than in the  
 218 southeast.<sup>24</sup> Therefore, both terrestrial inputs and biological factors are found to jointly  
 219 govern the distribution pattern of DOP in overlying water from HLH.  
 220

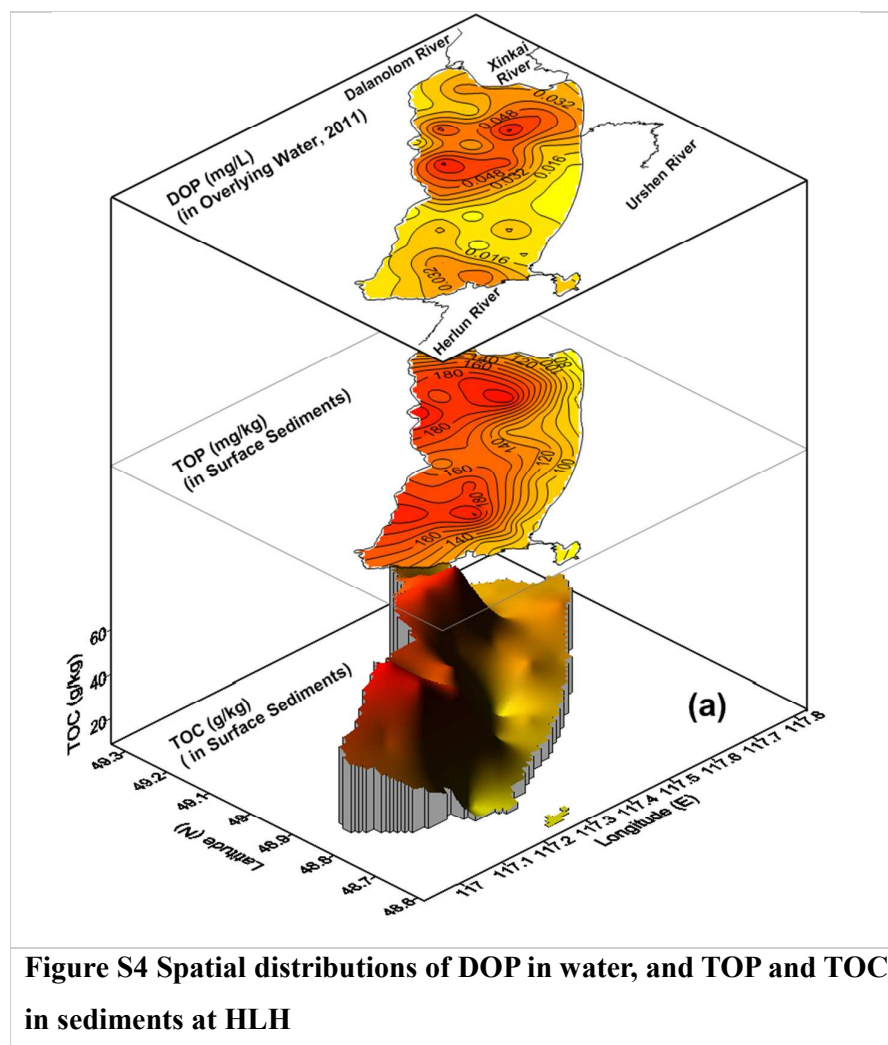

221

### 222 3.2 Impacts of Fe, Al and Ca

223 P extracted by 1.0 M HCl includes P bound to oxides/hydroxides of Fe and Al.<sup>25, 26</sup>  
 224 Accordingly, acid extractable OP (HCl-OP) are derived principally from the adsorption of OP  
 225 to Fe/Al oxides and hydroxides or from the formation of OP salts co-precipitated with  
 226 calcium ions.<sup>27</sup> Ferric oxide can strongly adsorb OP on their surfaces in soils<sup>28</sup> and  
 227 sediments,<sup>29</sup> even can play a governing role in most acidic soils and sediments. According to

our previous work, the average concentrations of Fe-P and Al-P were 1.54 and 2.04 mg/kg in sediment cores from HLH, respectively; while the pools of Fe-P and Al-P were much higher in the sediments from Lake WLSH, i.e. 11.10 and 7.15 mg/kg, respectively.<sup>30</sup> Therefore, both Fe-P and Al-P significantly correlated with HCl-OP and MLOP in the WLSH sediment cores, respectively; while no significant correlations were found in HLH. It suggested that Fe and Al oxyhydroxides play a more important role in OP accumulation and fractionation in Lake WLSH than in Lake Hulun<sup>30</sup> due to that the amount of iron oxide in the substrate governs the extent of OP adsorption.<sup>31, 32</sup>

Calcium (Ca) is usually more abundant than Fe and Al in aquatic environment. This is why P extracted by HCl in sediments is mainly found to be bound to Ca (mainly apatite).<sup>25, 26</sup> P bound to Ca is fractionated to ACa-P (authigenic carbonate fluorapatite + biogenic apatite + CaCO<sub>3</sub>-associated P) and De-P (detrital apatite P).<sup>33</sup> Calcium ions and its minerals can also complex with OP in soils or sediments<sup>34, 35</sup> For instance, precipitation of calcium salts with calcite occurs at even very low concentrations of *myo*-inositol hexakisphosphate<sup>36</sup> due to the simultaneous occurrence of adsorption and precipitation of insoluble calcium-phytate.<sup>37</sup> This may explain why the OP content is positively correlated to the calcium content.<sup>34</sup> As can be seen from Figure S5, the samples from WLSH and HLH were clustered in each their groups. Almost all of the points of Re-OP and HCl-OP in HLH sediment cores were found in the ranges of 50-70% and ~25%, respectively. As for HLH, Re-OP and HCl-OP in the ranges of 20-50% and 12-60%, respectively.<sup>30</sup> Furthermore, as well as HLH, the points of QL (Lake Qilu),<sup>4</sup> EH (Lake Erhai),<sup>1</sup> HF (Lake Hongfeng)<sup>1</sup> and LG (Lake Lugu)<sup>4</sup> presented in Area (a) (Figure S5). Comparatively, most lakes in Southwestern China Plateau were far away from local cities, where weathering and erosion were the main processes in the carbonate watershed.<sup>38</sup> It indicated that calcium ions and their minerals played a key role in regulating OP fractionations in these lakes due to co-precipitation with calcite.<sup>30, 39</sup>

As can be seen from Figure S5, as well as WLSH, the points standing for Lake Chaohu (CHAH),<sup>40-42</sup> Lake Gonghu (GH),<sup>43</sup> Lake Taihu (TH),<sup>40, 42</sup> Lake Meiliang (ML),<sup>43</sup> Lake Yuantouzhu (YTZ),<sup>44, 45</sup> Lake Jingpo (JP) and Lake Wudalianchi (WDLC)<sup>46</sup> distributed in Area (b) (Figure S5). These lakes including WLSH shared the same characteristics that excess nutrients, especially P, were input by wastewater discharge and agricultural runoff from the neighboring cities, which subsequently enhanced the association and adsorption of P on Fe/Al oxyhydroxides.<sup>40</sup> Previous publications showed that the fraction of P bound to Al and Fe oxyhydroxides was a major fraction, even the dominant fraction, in sediments from CHAH,<sup>40-42</sup> GH,<sup>43</sup> TH,<sup>40, 42-45</sup> JP and WDLC.<sup>46</sup> In light of the OP extraction scheme, HCl-OP

262 includes OP fractions adsorbed to Fe and Al oxyhydroxides or OP salts co-precipitated with  
 263 calcium ions. As a result of the mentioned above, it suggested that OP fractionations were  
 264 jointly regulated by Ca, Fe and Al and their minerals in sediments (Figure S5).<sup>30</sup>

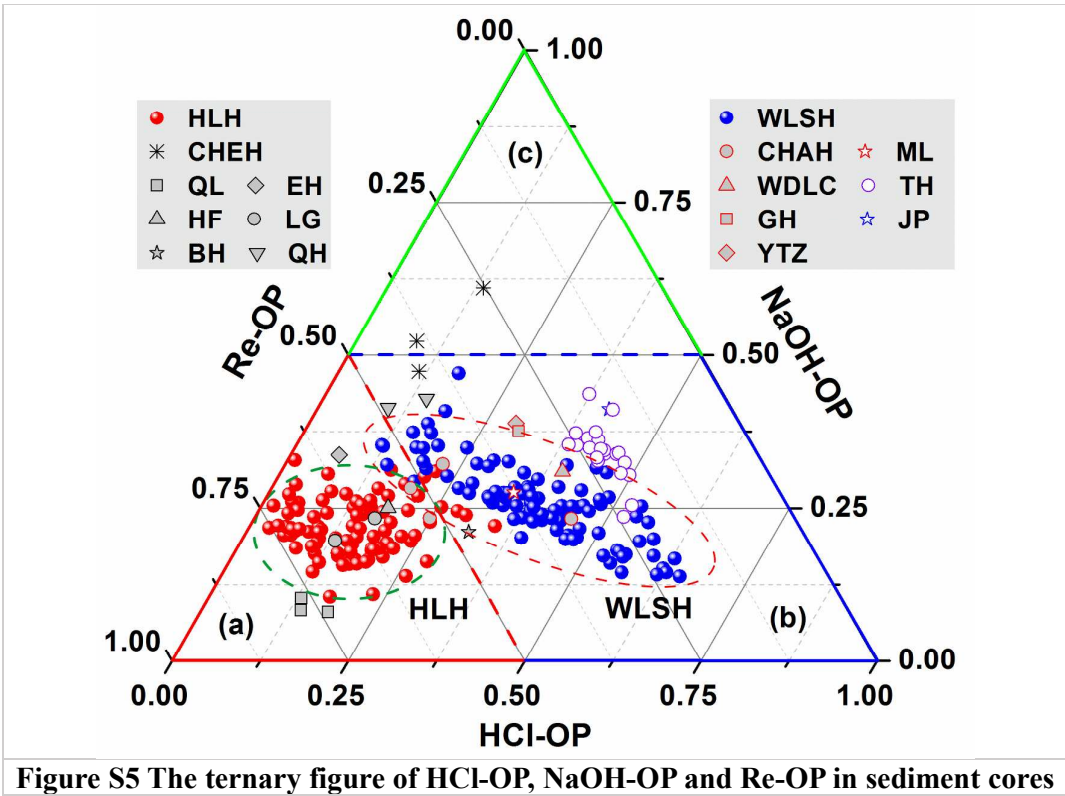

265 **Figure S5 The ternary figure of HCl-OP, NaOH-OP and Re-OP in sediment cores**

266 The vertical distribution of TP and TOC in the core of HLH15 is shown in Figure S6.

267 Significant correlations between TOP and TP were found both in the surface sediments and in

268 the sediment core from Lake Hulun (Figure S7). Mean annual temperature (MAT) and ratios

269 of E/P (evaporation/precipitation) and their trends in the Lake Hulun basin from 1960's till

270 present are depicted in Figure S8.

271

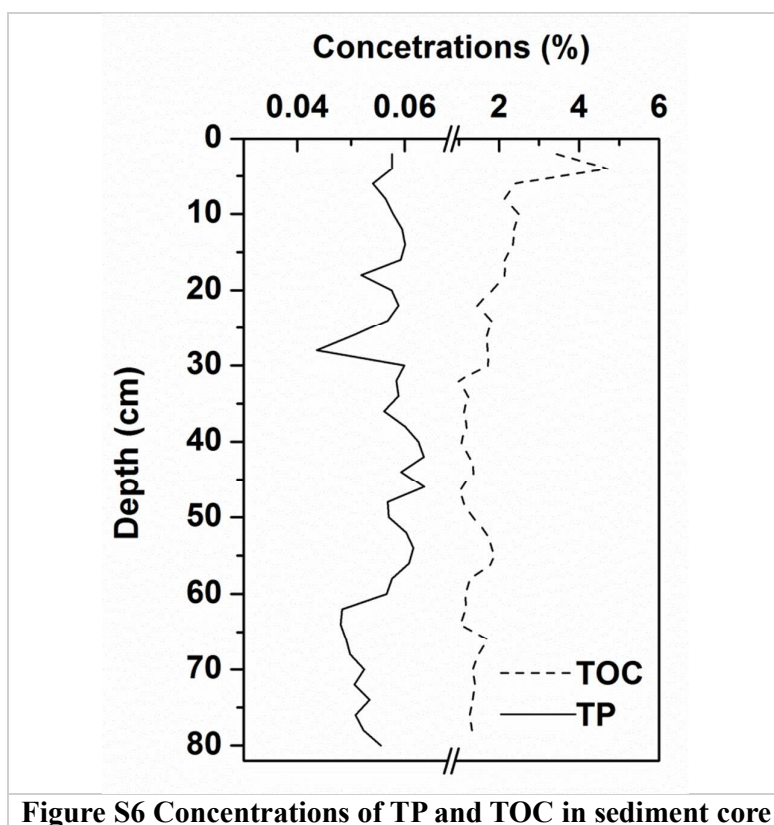

Figure S6 Concentrations of TP and TOC in sediment core

272

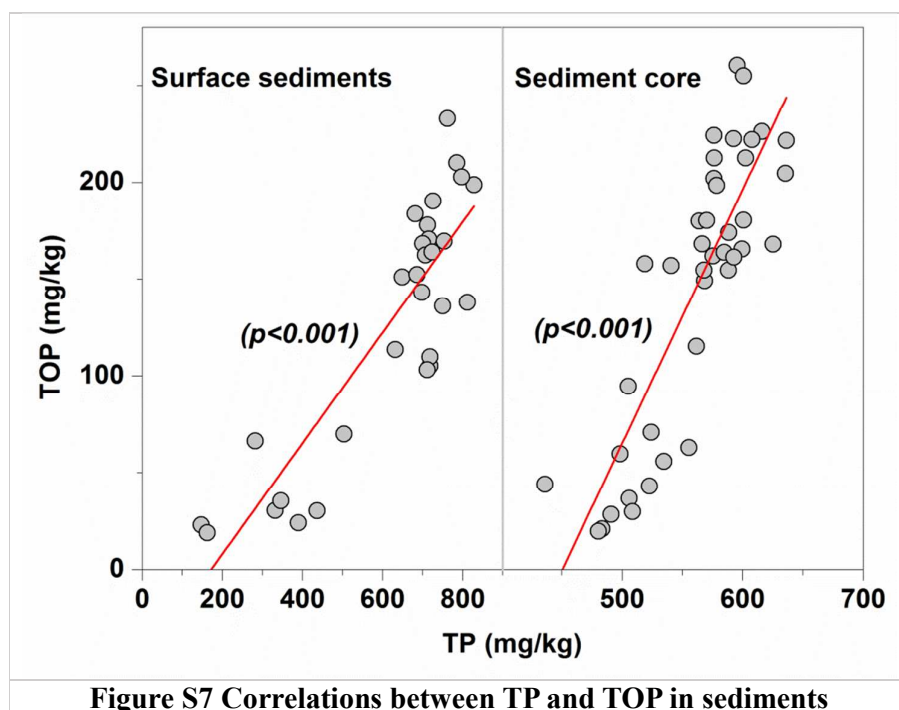

Figure S7 Correlations between TP and TOP in sediments

273

274

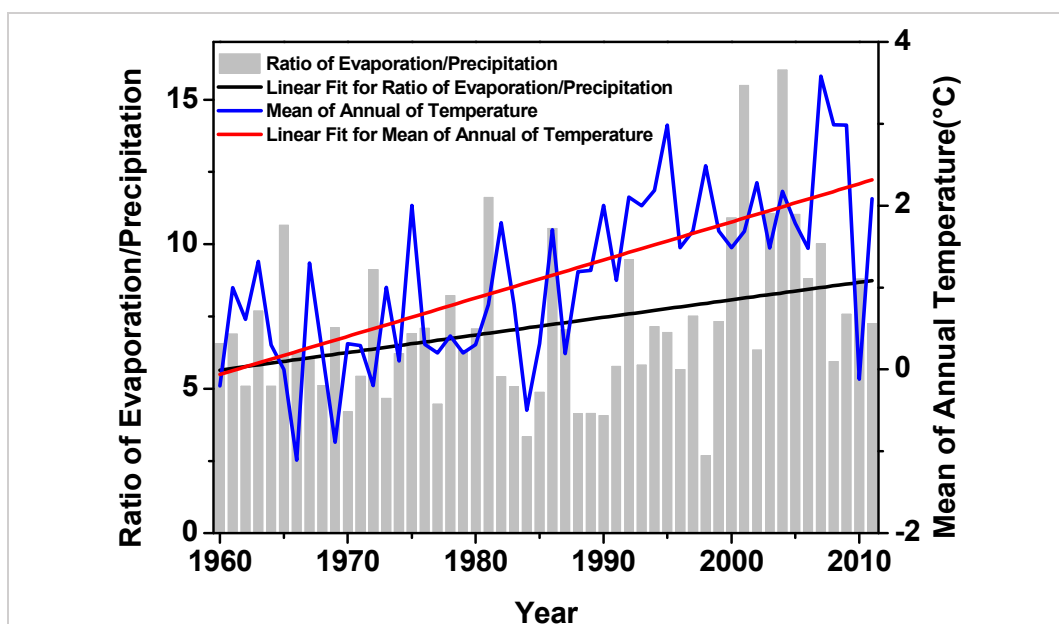

Figure S8 Changes of MAT and E/P ratio in the basin of Lake Hulun from 1960's

275

## 276 References

- 277 (1) Zhang, R.; Wu, F.; Liu, C.; Fu, P.; Li, W.; Wang, L.; Liao, H.; Guo, J., Characteristics of organic  
 278 phosphorus fractions in different trophic sediments of lakes from the middle and lower reaches of Yangtze River  
 279 region and Southwestern Plateau, China. *Environ. Pollut.* **2008**, *152* (2), 366-372.  
 280 (2) Murphy, J.; Riley, J. P., A modified single solution method for the determination of phosphate in natural  
 281 waters. *Anal. Chim. Acta* **1962**, *27*, 31-36.  
 282 (3) Rowland, A. P.; Haygarth, P. M., Determination of total dissolved phosphorus in soil solutions. *J. Environ.*  
 283 *Qual.* **1997**, *26* (2), 410-415.  
 284 (4) Huo, S.; Zan, F.; Xi, B.; Li, Q.; Zhang, J., Phosphorus fractionation in different trophic sediments of lakes  
 285 from different regions, China. *J. Environ. Monitor.* **2011**, *13* (4), 1088-1095.  
 286 (5) Mebius, L. J., A rapid method for the determination of organic carbon in soil. *Anal. Chim. Acta* **1960**, *22*,  
 287 120-124.  
 288 (6) Schumacher, B. A., *Methods for the determination of total organic carbon (TOC) in soils and sediments*.  
 289 USEPA Environmental Sciences Division National Exposure Research Laboratory, Ecological Risk Assessment  
 290 Support Center, Office of Research and Development: Las Vegas, NV, 2002.  
 291 (7) Lü, C. W.; He, J.; Sun, H. M.; Xue, H. X.; Liang, Y.; Bai, S.; Sun, Y.; Shen, L. L.; Fan, Q. Y., Application  
 292 of allochthonous organic carbon and phosphorus forms in the interpretation of past environmental conditions.  
 293 *Environ. Geol.* **2008**, *55* (6), 1279-1289.  
 294 (8) Appleby, P. G., Three decades of dating recent sediments by fallout radionuclides: a review. *Holocene*  
 295 **2008**, *18* (1), 83-93.  
 296 (9) Mulholland, P. J.; Elwood, J. W., The role of lake and reservoir sediments as sinks in the perturbed global  
 297 carbon cycle. *Tellus* **1982**, *34* (5), 490-499.  
 298 (10) Talbot, M. R.; Livingstone, D. A., Hydrogen index and carbon isotopes of lacustrine organic matter as lake  
 299 level indicators. *Palaeogeogr. Palaeoclimatol.* **1989**, *70* (1), 121-137.  
 300 (11) Turcq, B.; Albuquerque, A. L. S.; Cordeiro, R. C.; Sifeddine, A.; Simoes Filho, F. F. L.; Souza, A. G.;  
 301 Abrao, J. J.; Oliveira, F. B. L.; Silva, A. O.; Capitaneo, J., Accumulation of organic carbon in five Brazilian  
 302 lakes during the Holocene. *Sediment. Geol.* **2002**, *148* (1-2), 319-342.  
 303 (12) Meyers, P. A., Applications of organic geochemistry to paleolimnological reconstructions: a summary of  
 304 examples from the Laurentian Great Lakes. *Org. Geochem.* **2003**, *34* (2), 261-289.  
 305 (13) Hu, F. S.; Ito, E.; Brubaker, L. B.; Anderson, P. M., Ostracode geochemical record of Holocene climatic  
 306 change and implications for vegetational response in the northwestern Alaska Range. *Quaternary Res.* **1998**, *49*  
 307 (1), 86-95.  
 308 (14) Šmilauer, P.; Lepš, J., *Multivariate Analysis of Ecological Data Using CANOCO 5*. Cambridge University  
 309 Press: Cambridge, UK, 2014.  
 310 (15) Ji, L.; Xia, W.; Xiang, L.; Wang, S., Mineral composition and sedimentation rate of surficial sediments in



311 Hulun Lake, Inner Mongolia. *J. Lake Sci.* **1994**, 6 (3), 227-232. (in Chinese).  
 312 (16) Benitez-Nelson, C. R., The biogeochemical cycling of phosphorus in marine systems. *Earth-Sci. Rev.* **2000**,  
 313 51 (1), 109-135.  
 314 (17) Wu, J.; Sunda, W.; Boyle, E. A.; Karl, D. M., Phosphate depletion in the western North Atlantic Ocean.  
 315 *Science* **2000**, 289 (5480), 759-762.  
 316 (18) Monaghan, E.; Ruttenberg, K., Dissolved organic phosphorus in the coastal ocean: Reassessment of  
 317 available methods and seasonal phosphorus profiles from the Eel River Shelf. *Limnol. Oceanogr.* **1999**, 44 (7),  
 318 1702-1714.  
 319 (19) Dyhrman, S. T.; Chappell, P. D.; Haley, S. T.; Moffett, J. W.; Orchard, E. D.; Waterbury, J. B.; Webb, E. A.,  
 320 Phosphonate utilization by the globally important marine diazotroph *Trichodesmium*. *Nature* **2006**, 439 (7072),  
 321 68-71.  
 322 (20) Paytan, A.; McLaughlin, K., The oceanic phosphorus cycle. *Chem. Rev.* **2007**, 107 (2), 563-576.  
 323 (21) Labry, C.; Herbland, A.; Delmas, D., The role of phosphorus on planktonic production of the Gironde  
 324 plume waters in the Bay of Biscay. *J. Plank. Res.* **2002**, 24, 97-117.  
 325 (22) Boyer, J. N.; Dailey, S. K.; Gibson, P. J.; Rogers, M. T.; Mir-Gonzalez, D., The role of dissolved organic  
 326 matter bioavailability in promoting phytoplankton blooms in Florida Bay. *Hydrobiologia* **2006**, 569 (1), 71-85.  
 327 (23) Johannes, R., Uptake and release of dissolved organic phosphorus by representatives of a coastal marine  
 328 ecosystem. *Limnol. Oceanogr.* **1964**, 9 (2), 224-234.  
 329 (24) Jiang, Z. F.; Li, C. Y.; Zhang, S.; Jia, K. L.; Shi, X. H., Phytoplankton and nutrition evaluation in Hulun  
 330 Lake. *J. Agro-Environ. Sci.* **2011**, 30 (4), 726-732. (in Chinese).  
 331 (25) Rydin, E., Potentially mobile phosphorus in Lake Erken sediment. *Water Res.* **2000**, 34 (7), 2037-2042.  
 332 (26) Lukkari, K.; Leivuori, M.; Kotilainen, A., The chemical character and behaviour of phosphorus in poorly  
 333 oxygenated sediments from open sea to organic-rich inner bay in the Baltic Sea. *Biogeochemistry* **2009**, 96 (1-3),  
 334 25-48.  
 335 (27) Celi, L.; Barberis, E., Abiotic stabilization of organic phosphorus in the environment. In: Turner B L,  
 336 Frossad E, Baldwin D S. *Organic phosphorus in the environment*. Oxford University Press: Boston **2005**,  
 337 113-132.  
 338 (28) Anderson, G.; Arlidge, E. Z., The adsorption of inositol phosphates and glycerophosphate by soil clays,  
 339 clay minerals, and hydrated sesquioxides in acid media. *J. Soil Sci.* **1962**, 13 (2), 216-224.  
 340 (29) De Groot, C.; Golterman, H., On the presence of organic phosphate in some Camargue sediments:  
 341 evidence for the importance of phytate. *Hydrobiologia* **1993**, 252 (1), 117-126.  
 342 (30) Lü, C.; He, J.; Zuo, L.; Vogt, R. D.; Zhu, L.; Zhou, B.; Mohr, C. W.; Guan, R.; Wang, W.; Yan, D.,  
 343 Processes and their explanatory factors governing distribution of organic phosphorous pools in lake sediments.  
 344 *Chemosphere* **2016**, 145, 125-134.  
 345 (31) Anderson, G.; Williams, E. G.; Moir, J. O., A comparison of the sorption of inorganic orthophosphate and  
 346 inositol hexaphosphate by six acid soils. *J. Soil Sci.* **1974**, 25 (1), 51-62.  
 347 (32) Pant, H. K.; Edwards, A. C.; Vaughan, D., Extraction, molecular fractionation and enzyme degradation of  
 348 organically associated phosphorus in soil solutions. *Biol. Fert. Soils* **1994**, 17 (3), 196-200.  
 349 (33) Ruttenberg, K. C., Development of a Sequential Extraction Method for Different Forms of Phosphorus in  
 350 Marine Sediments. *Limnol. Oceanogr.* **1992**, 37 (7), 1460-1482.  
 351 (34) Harrison, A. F., *Soil organic phosphorus: a review of world literature*. CAB International Wallingford, UK,  
 352 257 pp: 1987.  
 353 (35) House, W. A.; Denison, F. H., Total phosphorus content of river sediments in relationship to calcium, iron  
 354 and organic matter concentrations. *Sci. Total Environ.* **2002**, 282, 341-351.  
 355 (36) Celis, R.; Hermosin, M. C.; Cornejo, J., Heavy Metal Adsorption by Functionalized Clays. *Environ. Sci.*  
 356 *Technol.* **2000**, 34 (21), 4593-4599.  
 357 (37) Celi, L.; Presta, M.; Ajmore-Marsan, F.; Barberis, E., Effects of pH and electrolytes on inositol  
 358 hexaphosphate interaction with goethite. *Soil Sci. Soc. Am. J.* **2001**, 65 (3), 753-760.  
 359 (38) Wu, F.; Qing, H.; Wan, G.; Tang, D.; Huang, R.; Cal, Y., Geochemistry of  $\text{HCO}_3^-$  at the sediment-water  
 360 interface of lakes from the southwestern Chinese plateau. *Water Air Soil Pollut.* **1997**, 99 (1-4), 381-389.  
 361 (39) Søndergaard, M.; Windolf, J.; Jeppesen, E., Phosphorus fractions and profiles in the sediment of shallow  
 362 Danish lakes as related to phosphorus load, sediment composition and lake chemistry. *Water Res.* **1996**, 30 (4),  
 363 992-1002.  
 364 (40) Huang, Q.; Wang, Z.; Wang, D.; Wang, C.; Ma, M.; Jin, X., Origins and mobility of phosphorus forms in  
 365 the sediments of Lakes Taihu and Chaohu, China. *J. Environ. Sci. Heal.* **2005**, 40 (1), 91-102.  
 366 (41) Zan, F.; Huo, S.; Xi, B.; Li, Q.; Liao, H.; Zhang, J., Phosphorus distribution in the sediments of a shallow  
 367 eutrophic lake, Lake Chaohu, China. *Environ. Earth Sci.* **2011**, 62 (8), 1643-1653.  
 368 (42) Zhu, G. W.; Qin, B. Q.; Zhang, L.; Luo, L. C., Geochemical Forms of Phosphorus in Sediments of Three  
 369 Large, Shallow Lakes of China. *Pedosphere* **2006**, 16 (6), 726-734.  
 370 (43) Jin, X.; Wang, S.; Pang, Y.; Wu, F. C., Phosphorus fractions and the effect of pH on the phosphorus release  
 371 of the sediments from different trophic areas in Taihu Lake, China. *Environ. Pollut.* **2006**, 139 (2), 288-295.

372 (44) Sun, X.; Zhang, Y.; Yang, M.; Zhang, B., Phosphorus distribution characteristics in suspended matter in  
 373 Taihu Lake. *J. Safe. Environ.* **2005**, 5 (4), 19-22 (in Chinese).  
 374 (45) Yuan, X.; Chen, J.; Tao, Y.; Ji, J.; Xu, N., Spatial characteristics and environmental implication of nitrogen  
 375 and phosphorus from bottom sediments in northern Taihu Lake. *Geochimica* **2002**, 31 (4), 321-328 (in Chinese).  
 376 (46) Xiong, S.; Xi, B.; Wei, D.; Wang, Y.; Wei, Z.; Xuan, P.; Mao, Y., Distribution of different phosphorus  
 377 fractions in surface sediment of Wudalianchi. *Environ. Sci. Technol.* **2011**, 34 (9), 95-99 (in Chinese).  
 378  
 379
